# Supplementary material for: Di-Tyrosine Crosslinking and NOX4 Expression as Oxidative Pathological Markers in the Lungs of Patients with Idiopathic Pulmonary Fibrosis
Source: MDPI journal article supplement (doi:10.3390/antiox10111833), 2021-11-18
Supplement: s1 [file s1]

**Supplementary Materials:**

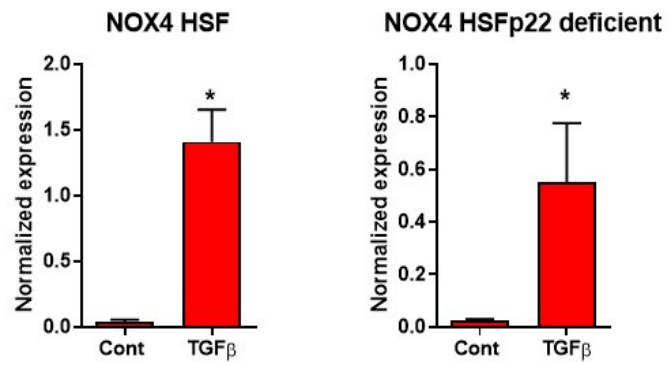

**Figure S1.** TGFβ1-induced upregulation of the expression of NOX4 in human skin fibroblasts from healthy donor (HSF) and CYBA-deficient patient (HSFp22 deficient). N = 4, \*  $p < 0.05$  using Mann Whitney nonparametric test.

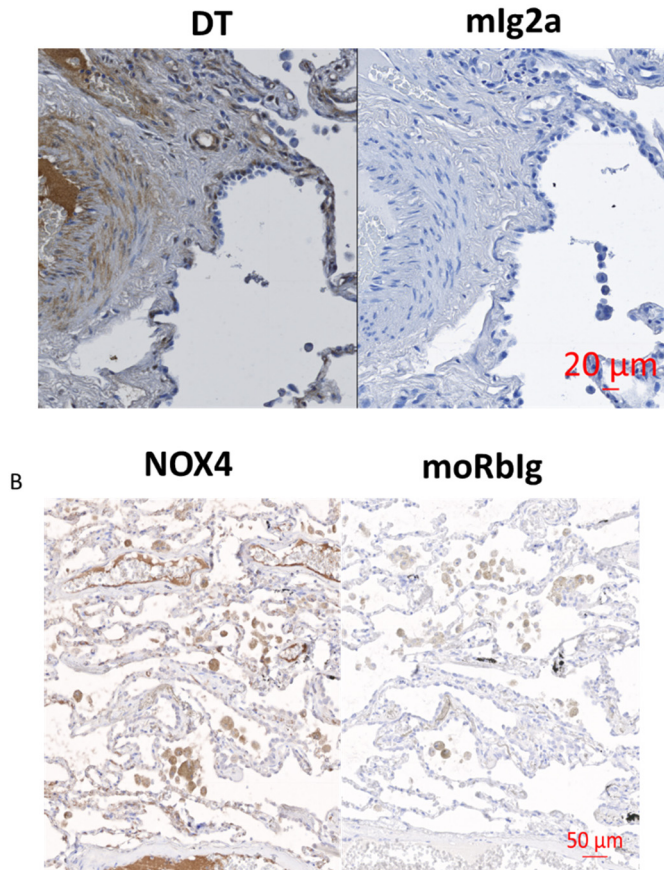

**Figure S2.** Representative images of DT (A) and NOX4 (B) staining in fibrotic regions of IPF/UIP samples and comparison were their respective isotype antibody controls.
